# Supplementary material for: Increased Platelet-CD4+ T Cell Aggregates Are Correlated With HIV-1 Permissiveness and CD4+ T Cell Loss
Source: PubMed Central journal article supplement (PMC8720770; doi:10.3389/fimmu.2021.799124), 2021-12-20
Supplement: DataSheet_1.pdf [file DataSheet_1.pdf]

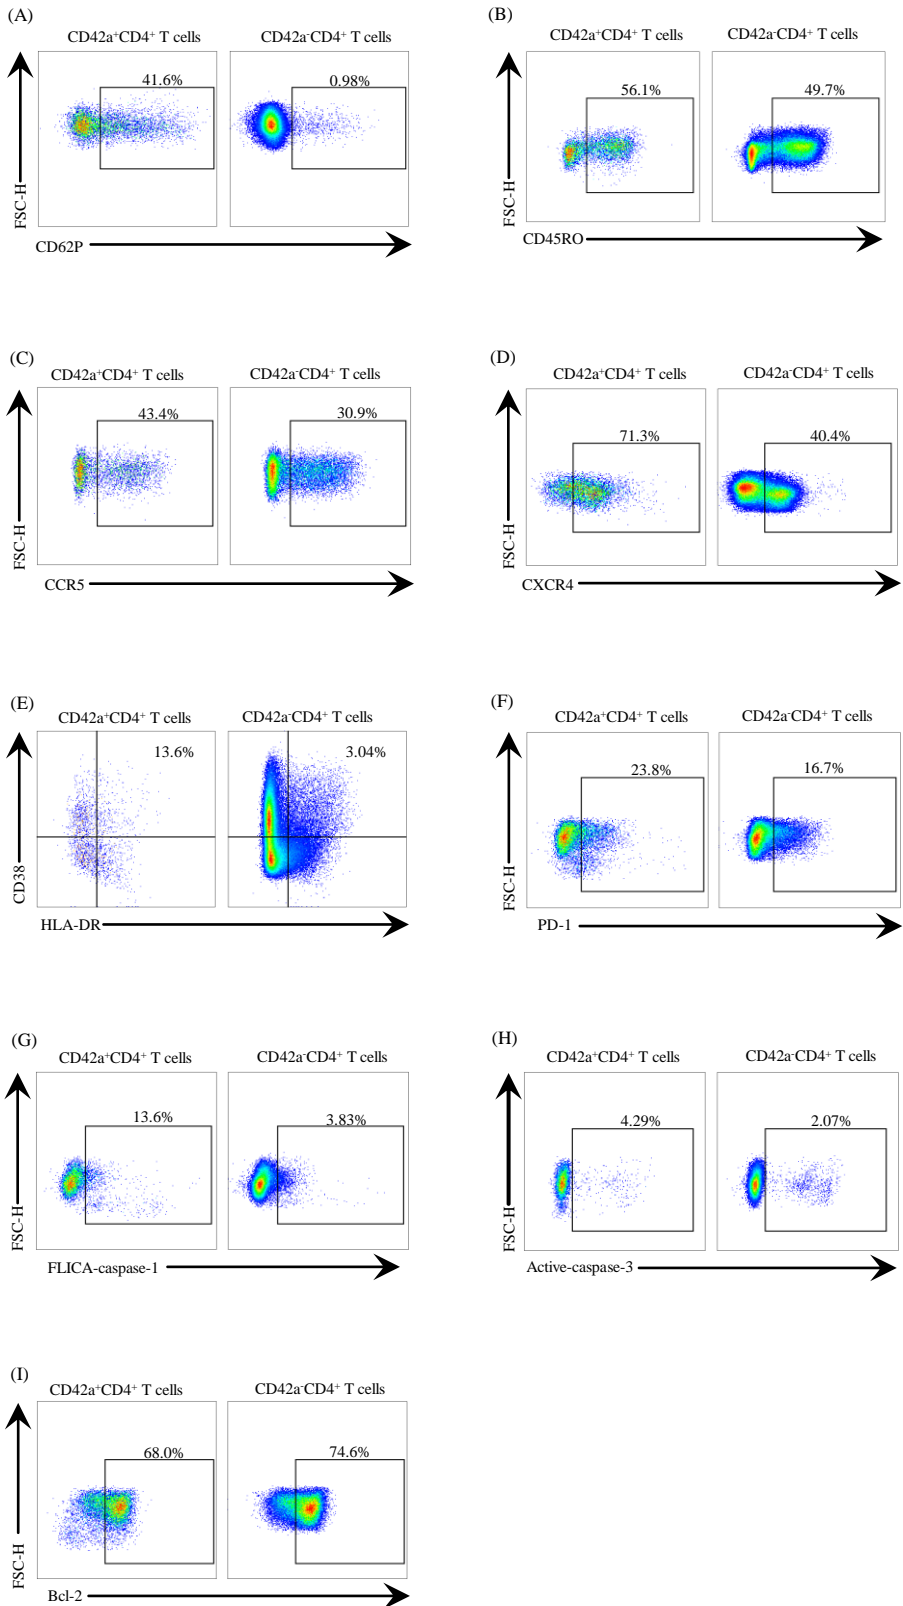

Supplementary Figure 1. Detection of phenotypic characteristics of platelet-CD4<sup>+</sup> T cell aggregates. Representative gating strategy for CD62P (A), CD45RO (B), CCR5 (C), CXCR4 (D), HLA-DR/CD38 (E), PD-1 (F), FLICA-caspase-1 (G), Active-caspase-3 (H), and Bcl-2 (I) expression in platelet-CD4<sup>+</sup> T cell aggregates and their counterparts.
